# Supplementary material
Source: Springer Nature journal article supplement (https://www.springermedizin.de/resource/supplementary/12974_2013_897_MOESM2_ESM.pdf/9600106)
Supplement: MOESM2 [file 9600106]

**Supplementary Table 1**

| <b>GENE</b>          | <b>% CK vs C</b> |
|----------------------|------------------|
| Ccl5 (RANTES)        | 39388            |
| Mmp3                 | 10820            |
| Cd83_predicted       | 10720            |
| Cxcl5                | 10296            |
| Ccl20                | 9363             |
| Enpp2                | 6996             |
| Cfb                  | 6072             |
| Lcn2                 | 6058             |
| Cxcl11               | 5169             |
| LOC360228            | 4906             |
| Pla2g2a              | 4752             |
| Cxcl2                | 3115             |
| Cx3cl1               | 2856             |
| LOC497841            | 2699             |
| Rbp1                 | 2300             |
| Ccl7 (MCP3)          | 2018             |
| Ccl19_predicted      | 1793             |
| Chi3l1               | 1627             |
| Sod2                 | 1511             |
| Tlr2                 | 1494             |
| Mx1                  | 1484             |
| Slpi                 | 1473             |
| Vcam1                | 1426             |
| Asgr1                | 1426             |
| Ass                  | 1422             |
| Gbp2                 | 1376             |
| Ubd                  | 1290             |
| Ccl2 (MCP1)          | 1278             |
| Hsd11b1              | 1243             |
| Cxcl16               | 1220             |
| Ptges                | 1214             |
| Cxcl10 (IP10)        | 1203             |
| Birc3                | 1040             |
| Cyp7b1               | 1014             |
| LOC311984            | 984              |
| Cxcl13               | 937              |
| RT1-S3               | 914              |
| H2-Ea                | 903              |
| Rtp4_predicted       | 870              |
| LincR                | 859              |
| RGD1564528_predicted | 830              |
| Cxcl1 (GRO1)         | 761              |
| LOC363060            | 759              |
| Gbp5_predicted       | 727              |
| Scn4b                | 704              |
| Jak2                 | 694              |
| Casp1                | 689              |
| Gch1                 | 673              |
| LOC294942            | 673              |
| Cxcl12               | 673              |
| Cd302                | 667              |
| Tnfrsf11b            | 661              |
| Cd69                 | 659              |

| <b>GENE</b>       | <b>% MCM[+] vs C</b> |
|-------------------|----------------------|
| Cfb               | 25891                |
| Cxcl5             | 14091                |
| Ccl20             | 9745                 |
| Slpi              | 8253                 |
| Lcn2              | 7882                 |
| Chi3l1            | 7565                 |
| Cxcl11            | 4800                 |
| Cd83_predicted    | 3067                 |
| Ccl5 (RANTES)     | 2734                 |
| Pf4               | 2369                 |
| Enpp2             | 2332                 |
| Sod2              | 2322                 |
| Pla2g2a           | 2234                 |
| Orm1              | 2216                 |
| Mgp               | 2155                 |
| Ccl7 (MCP3)       | 2107                 |
| Ptges             | 2096                 |
| LOC497841         | 2047                 |
| Cxcl2             | 2000                 |
| Serp1ng1          | 1997                 |
| Asgr1             | 1744                 |
| Rbp1              | 1697                 |
| Slc16a3           | 1614                 |
| Rtp4_predicted    | 1588                 |
| Mx1               | 1576                 |
| Mmp3              | 1539                 |
| LOC360228         | 1348                 |
| Serpina3n         | 1226                 |
| Sfrp2             | 1212                 |
| Tlr2              | 1173                 |
| RT1-S3            | 1170                 |
| Ccl2 (MCP1)       | 1169                 |
| Cyp7b1            | 1119                 |
| Cd302             | 1085                 |
| Birc3             | 1058                 |
| Oasl2             | 1039                 |
| isg12(b)          | 1020                 |
| Vcam1             | 1016                 |
| Tf                | 988                  |
| Ccl6              | 962                  |
| Il1b              | 949                  |
| Cxcl12            | 946                  |
| LOC498276         | 932                  |
| Ifit1             | 920                  |
| Cxadr             | 890                  |
| Irf7              | 877                  |
| Slc39a8_predicted | 830                  |
| Cxcl9             | 781                  |
| Ccl19_predicted   | 770                  |
| Slc39a8           | 768                  |
| Gbp2              | 754                  |
| Gch1              | 753                  |
| Cx3cl1            | 735                  |

|                      |     |
|----------------------|-----|
| Pde4b                | 657 |
| RGD1560020_predicted | 655 |
| Ifngr1               | 635 |
| Oasl2                | 623 |
| Upp1                 | 618 |
| Mgp                  | 604 |
| Madcam1              | 590 |
| Tnip1_predicted      | 575 |
| Nfkb2                | 573 |
| RGD1561113_predicted | 571 |
| Irf1                 | 570 |
| Msln                 | 567 |
| Slc1a1               | 563 |
| Nos2 (iNOS)          | 560 |
| Cxcl9                | 550 |
| Icam1                | 550 |
| Tf                   | 550 |
| Has2                 | 546 |
| Psmb9                | 534 |
| RT1-A2               | 533 |
| Irf7                 | 533 |
| Mmp9                 | 529 |
| Sh2b2                | 504 |
| Abcb1b               | 501 |
| Nfkbia               | 493 |
| Tnnt2                | 491 |
| RGD1563437_predicted | 491 |
| Slc13a3              | 490 |
| Fgr                  | 487 |
| Map3k8               | 485 |
| Cdc42ep2             | 484 |
| Emr1                 | 480 |
| Psmb8                | 473 |
| RGD1563354_predicted | 468 |
| Csf1 (M-CSF)         | 467 |
| LOC310968            | 464 |
| RT1-149              | 464 |
| LOC501092            | 462 |
| Serping1             | 457 |
| LOC289918            | 456 |
| RT1-A3               | 452 |
| Csf2                 | 450 |
| Rgs7                 | 450 |
| LOC288515            | 444 |
| RT1-CE15             | 444 |
| Nrep                 | 439 |
| Cyp1b1               | 438 |
| Hdc                  | 437 |
| Slc11a2 (DMT1)       | 435 |
| Gypc                 | 434 |
| Nfkbie               | 433 |
| Ibrdc3_predicted     | 432 |
| Plxnd1_predicted     | 432 |
| Ifit1                | 430 |
| Ripk2                | 427 |
| C1s                  | 425 |

|                      |     |
|----------------------|-----|
| LOC289918            | 733 |
| Rarres2              | 728 |
| RGD1564528_predicted | 726 |
| Cxcl16               | 723 |
| Cxcl1 (GRO1)         | 705 |
| LOC363060            | 694 |
| Jak2                 | 690 |
| Cebpb                | 665 |
| Pde4b                | 656 |
| Upp1                 | 653 |
| Ccl3 (MIP1alpha)     | 649 |
| Msln                 | 649 |
| Pdgfra               | 648 |
| LOC311984            | 629 |
| C2                   | 628 |
| LOC294942            | 598 |
| RGD1561113_predicted | 596 |
| Rnf125_predicted     | 577 |
| Ak3l1                | 577 |
| RGD1310093_predicted | 576 |
| Cxcl13               | 571 |
| Mx2                  | 566 |
| Cxcl10 (IP10)        | 565 |
| Ifi47                | 563 |
| LOC299279            | 560 |
| Steap1_predicted     | 559 |
| Hpgd                 | 558 |
| Fgr                  | 549 |
| Ngfb_mapped          | 548 |
| RGD1564259_predicted | 543 |
| RT1-CE7              | 539 |
| Ifi271               | 536 |
| Rnd1                 | 515 |
| Slc1a1               | 509 |
| C1s                  | 508 |
| LOC498277            | 507 |
| RT1-A2               | 505 |
| Oas1a                | 504 |
| Il1a                 | 489 |
| Cipar1               | 482 |
| Col14a1_predicted    | 479 |
| Mt1a                 | 475 |
| Ccl4                 | 472 |
| LOC497811            | 469 |
| Hsd11b1              | 468 |
| Gja5                 | 463 |
| Casp1                | 461 |
| Ube2l6               | 453 |
| Ifitm1_predicted     | 451 |
| Emilin1_predicted    | 448 |
| Cyp1b1               | 447 |
| Oas1i                | 446 |
| Nfkbia               | 444 |
| Mmp9                 | 440 |
| LOC498279            | 436 |
| C1qc                 | 435 |

|                      |     |
|----------------------|-----|
| Ifi47                | 424 |
| Camk1g               | 418 |
| RT1-CE7              | 416 |
| Sh3gl3               | 412 |
| Ampd3                | 411 |
| Clu (clusterin)      | 411 |
| LOC497812            | 406 |
| Stap2                | 398 |
| RT1-M6-2             | 392 |
| Sept4 (38963)        | 389 |
| Pla1a                | 388 |
| Zc3h12a_predicted    | 388 |
| Htr7                 | 387 |
| Apol3_predicted      | 383 |
| Cebpb                | 383 |
| Ube2l6               | 378 |
| Lgals3bp             | 377 |
| RT1-A1               | 377 |
| Psmb10               | 376 |
| Gpr176               | 371 |
| Psme2                | 371 |
| Klf4                 | 367 |
| LOC299339            | 365 |
| Birc2                | 361 |
| Cdc42ep5_predicted   | 361 |
| Ua20                 | 356 |
| Smoc2_predicted      | 354 |
| Ngfb_mapped          | 352 |
| Slc15a3              | 351 |
| Xcl1                 | 348 |
| Pde9a                | 348 |
| Msc_predicted        | 346 |
| Irf6_predicted       | 343 |
| RGD1563091_predicted | 332 |
| LOC498371            | 325 |
| Ppap2b               | 325 |
| Zmynd15_predicted    | 322 |
| Gad1                 | 321 |
| Irgm                 | 320 |
| Tifa                 | 320 |
| LOC501245            | 317 |
| Nfkbib               | 317 |
| LOC689135            | 317 |
| Herc6                | 317 |
| Pdgfra               | 316 |
| H2-M10.6             | 315 |
| RGD1565710_predicted | 314 |
| Cd74                 | 313 |
| Rnf125_predicted     | 312 |
| Tnfaip8_predicted    | 312 |
| Bckdhb               | 310 |
| LOC691575            | 310 |
| Slc6a6               | 309 |
| Ifi271               | 304 |
| Olr472               | 304 |
| Agtr1a               | 302 |

|                      |     |
|----------------------|-----|
| Rasd1                | 433 |
| Cpxm1_predicted      | 428 |
| Lgals3bp             | 425 |
| Tnip1_predicted      | 415 |
| RT1-CE15             | 412 |
| LOC497812            | 412 |
| Icam1                | 409 |
| RT1-M6-2             | 409 |
| RGD1562052_predicted | 409 |
| Ppap2b               | 404 |
| Lincr                | 402 |
| Map3k8               | 402 |
| Sept4 (38963)        | 400 |
| Lum                  | 400 |
| Bst1                 | 398 |
| Clu (clusterin)      | 396 |
| Nfkb2                | 396 |
| LOC310968            | 394 |
| Gbp5_predicted       | 392 |
| H2-Ea                | 388 |
| Serpine1             | 386 |
| Oasl                 | 385 |
| Pde9a                | 385 |
| Ass                  | 384 |
| Birc2                | 383 |
| Sst                  | 382 |
| Psmb8                | 381 |
| Ccl12_predicted      | 380 |
| Nell2                | 374 |
| LOC686871            | 373 |
| Vgf                  | 372 |
| RT1-A3               | 370 |
| Fam38a_predicted     | 370 |
| Ctss                 | 370 |
| Irgm                 | 366 |
| Angptl4              | 362 |
| RGD1563091_predicted | 362 |
| Ms4a4a_predicted     | 361 |
| Nfkbiz_predicted     | 357 |
| Zc3h12a_predicted    | 356 |
| RT1-149              | 354 |
| Bckdhb               | 354 |
| Adora2a              | 351 |
| Gpr88                | 348 |
| Ifngr1               | 346 |
| C1r                  | 346 |
| RGD1311559_predicted | 345 |
| Aebp1_predicted      | 343 |
| Aif1 (IBA1)          | 341 |
| Tnn_predicted        | 341 |
| C1qb                 | 341 |
| Tgm2                 | 340 |
| Slc11a2 (DMT1)       | 339 |
| Herc6                | 339 |
| Timp1                | 338 |
| LOC499985            | 338 |

|                      |     |
|----------------------|-----|
| RGD1311559_predicted | 302 |
| Orm1                 | 302 |
| C2                   | 302 |
| Asam                 | 301 |
| RGD1559845_predicted | 301 |
| Casp11               | 298 |
| LOC363320            | 294 |
| LOC691487            | 290 |
| Npb                  | 290 |
| LOC363434            | 289 |
| RT1-Ba               | 288 |
| LOC497769            | 288 |
| RGD1562717_predicted | 287 |
| Slc39a8_predicted    | 286 |
| Ikbke_predicted      | 286 |
| Hpx                  | 285 |
| Nfkb1                | 284 |
| Pappa_predicted      | 283 |
| LOC497768            | 282 |
| Nov                  | 281 |
| RGD1560723_predicted | 278 |
| RGD1309362           | 278 |
| RGD1309906           | 276 |
| LOC365510            | 275 |
| Hla-dmb              | 275 |
| Esm1                 | 275 |
| Junb                 | 275 |
| Edn1                 | 274 |
| Slc6a4               | 274 |
| Sp110                | 272 |
| LOC501224            | 272 |
| Rbp2                 | 270 |
| Ifngr2_predicted     | 269 |
| Serpina3n            | 269 |
| RGD1560819_predicted | 268 |
| Cpxm1_predicted      | 266 |
| P2rx5                | 266 |
| Il18bp               | 265 |
| Ifi44                | 265 |
| Flrt3_predicted      | 264 |
| Adprt11              | 264 |
| Sfrp2                | 263 |
| RGD1310093_predicted | 261 |
| Scin                 | 261 |
| Abcb4                | 261 |
| Slc39a8              | 260 |
| Crabp1_mapped        | 260 |
| LOC300043            | 259 |
| Tbc1d22b             | 259 |
| LOC686871            | 258 |
| Pnrc1                | 258 |
| Oas1a                | 257 |
| RGD1310490_predicted | 257 |
| Serpine1             | 257 |
| Nrp1                 | 257 |
| Fgf13                | 257 |

|                      |     |
|----------------------|-----|
| Irak3_predicted      | 337 |
| Ndrp1                | 335 |
| Tmem176b             | 335 |
| Edf1_predicted       | 335 |
| Scin                 | 334 |
| Fcgr3                | 330 |
| Lgi2_predicted       | 326 |
| Runx1                | 326 |
| Ifitm3               | 325 |
| Pygl                 | 324 |
| Tnfaip8_predicted    | 324 |
| LOC315106            | 322 |
| LOC681872            | 322 |
| Psmc9                | 321 |
| Tmem106a             | 321 |
| Sp110                | 319 |
| Slc15a3              | 319 |
| Hla-dmb              | 318 |
| RGD1564163_predicted | 316 |
| Sh2b2                | 315 |
| Arg1                 | 311 |
| Dnm1                 | 309 |
| Irf1                 | 309 |
| Osmr                 | 308 |
| Il1rn                | 306 |
| Tapbp                | 306 |
| Arhgdib              | 305 |
| Mgst2_predicted      | 305 |
| Mitd1                | 304 |
| Pnrc1                | 302 |
| Cdc42ep2             | 300 |
| Pfkl                 | 300 |
| Nrip1_predicted      | 297 |
| Pappa_predicted      | 297 |
| H2-M10.6             | 297 |
| S100a8               | 295 |
| Scn4b                | 293 |
| Sulf1                | 293 |
| RGD1308126_predicted | 293 |
| LOC288515            | 291 |
| Slnf3                | 291 |
| Ifi44                | 291 |
| Hmgn3                | 291 |
| Ereg                 | 289 |
| RGD1562323_predicted | 289 |
| Apln                 | 288 |
| RGD1310490_predicted | 287 |
| Tcea3                | 287 |
| Npb                  | 286 |
| Enpp3                | 286 |
| Olr472               | 286 |
| RGD1309759_predicted | 285 |
| Htr7                 | 284 |
| Il33                 | 284 |
| Junb                 | 283 |
| Has2                 | 283 |

|                      |     |
|----------------------|-----|
| Stat1                | 257 |
| RGD1564259_predicted | 256 |
| LOC316186            | 255 |
| Csf3                 | 255 |
| H2-M3                | 255 |
| Ikbkb                | 255 |
| Prnd_predicted       | 255 |
| Herc1_predicted      | 255 |
| Fam38a_predicted     | 253 |
| Irf5_predicted       | 253 |
| Klf15                | 251 |
| Bmp2                 | 251 |
| Rassf9               | 250 |
| Irak3_predicted      | 249 |
| Akr1b8               | 248 |
| Psme1                | 248 |
| Plk4_predicted       | 247 |
| LOC499365            | 247 |
| Nrip1_predicted      | 246 |
| C1r                  | 244 |
| Fam101b              | 244 |
| Oas1i                | 244 |
| Il1f8_predicted      | 244 |
| Steap1_predicted     | 242 |
| Slc1a2               | 241 |
| Stard4_predicted     | 241 |
| Slco3a1              | 239 |
| Nmi                  | 238 |
| Tmem123              | 238 |
| Tmem140              | 238 |
| Plat                 | 238 |
| Nfkbiz_predicted     | 237 |
| Ccl12_predicted      | 236 |
| Atp11a_predicted     | 236 |
| S100a5_predicted     | 236 |
| LOC500300            | 236 |
| LOC501250            | 236 |
| Eno2                 | 236 |
| Tapbp                | 236 |
| Olr1744              | 235 |
| Btg1                 | 235 |
| Slc16a3              | 234 |
| Mitd1                | 234 |
| isg12(b)             | 234 |
| RGD1309759_predicted | 233 |
| LOC501400            | 233 |
| Tap1                 | 232 |
| RGD1561715_predicted | 232 |
| LOC287622            | 232 |
| Rarres2              | 231 |
| RGD1560022_predicted | 231 |
| Col4a1               | 231 |
| RGD1306494_predicted | 231 |
| Cd1d1                | 231 |
| Epn3                 | 230 |
| Tgm2                 | 230 |

|                      |     |
|----------------------|-----|
| Psme2                | 283 |
| Ppp1r3c              | 282 |
| Tgm1                 | 282 |
| Tifa                 | 282 |
| Ua20                 | 282 |
| Emr1                 | 282 |
| Mrc1_predicted       | 281 |
| Ptgs2 (COX2)         | 281 |
| Cesl1                | 280 |
| Thbs4                | 279 |
| Csf3                 | 279 |
| Mgst1                | 277 |
| Nfkbie               | 277 |
| Nfkb1                | 276 |
| RGD1309906           | 276 |
| Ibrdc3_predicted     | 275 |
| Ch25h                | 275 |
| Slc16a1              | 275 |
| Cd36                 | 275 |
| LOC500687            | 274 |
| LOC299339            | 272 |
| Batf3                | 271 |
| RT1-A1               | 270 |
| Cd82                 | 268 |
| LOC689135            | 267 |
| Klf15                | 267 |
| Stat2                | 266 |
| RGD1309362           | 266 |
| Ier3                 | 265 |
| Rit2                 | 265 |
| Itga7                | 264 |
| Cyp4b1               | 263 |
| Ugcg                 | 263 |
| Gap43                | 261 |
| Eno2                 | 260 |
| Cfd                  | 260 |
| Il6                  | 258 |
| Slc9a3r1             | 257 |
| Cd68                 | 257 |
| Rgs7                 | 256 |
| Abcb4                | 255 |
| Pla2g4a              | 255 |
| Arg2                 | 254 |
| Adm                  | 254 |
| Abcb1b               | 252 |
| Fmo5                 | 252 |
| RGD1561715_predicted | 251 |
| Btg1                 | 250 |
| March3 (38778)       | 250 |
| Asam                 | 250 |
| Acsbg1               | 250 |
| Irf9                 | 249 |
| Serpinb2             | 249 |
| Bcl2a1d              | 249 |
| Lcp1                 | 249 |
| Gda                  | 249 |

|                      |     |
|----------------------|-----|
| Ptprv                | 230 |
| P4ha2_predicted      | 229 |
| Hmgn3                | 229 |
| Itga7                | 229 |
| Runx1                | 228 |
| Angptl4              | 228 |
| Ccrl2_predicted      | 227 |
| Pkp1_predicted       | 226 |
| Ralgs2               | 226 |
| Ets1                 | 225 |
| Cd44                 | 224 |
| Lrrc8c               | 224 |
| Lad1_predicted       | 224 |
| Gpr88                | 224 |
| Ii1b                 | 224 |
| Edf1_predicted       | 222 |
| Tcirg1               | 222 |
| Cxadr                | 222 |
| Vgf                  | 222 |
| LOC301044            | 221 |
| Rhbg                 | 221 |
| Mgmt                 | 220 |
| Mx2                  | 220 |
| Cd82                 | 220 |
| St6gal1              | 220 |
| Acsbg1               | 219 |
| Tcea3                | 219 |
| LOC690672            | 218 |
| Svil_predicted       | 218 |
| RT1-T24-1            | 218 |
| Btg2                 | 217 |
| Slc24a6              | 217 |
| Litaf                | 216 |
| Lin7a                | 214 |
| Cd72                 | 214 |
| Adrb2                | 213 |
| LOC689770            | 213 |
| Ii1rn                | 213 |
| Cib1                 | 212 |
| Stx6                 | 212 |
| LOC500687            | 212 |
| Cd47                 | 211 |
| March3 (38778)       | 210 |
| Sp140                | 210 |
| Phlda2_predicted     | 209 |
| LOC501399            | 209 |
| Cdc42ep3_predicted   | 209 |
| LOC315106            | 209 |
| Es1                  | 209 |
| Sulf1                | 209 |
| LOC500420            | 207 |
| RGD1305179_predicted | 207 |
| Tcp11                | 207 |
| Gadd45b              | 207 |
| Gls2                 | 207 |
| Oasl                 | 206 |

|                      |     |
|----------------------|-----|
| Nid2                 | 249 |
| Cdc42ep5_predicted   | 248 |
| Gpr176               | 247 |
| LOC365510            | 247 |
| Bnip3                | 247 |
| Apol9a               | 245 |
| LOC300043            | 245 |
| Abca1                | 243 |
| Gypc                 | 243 |
| Prdx5                | 241 |
| Tap1                 | 241 |
| Cd1d1                | 241 |
| Stat3                | 240 |
| Creb3l1              | 240 |
| Sh3gl3               | 239 |
| Adamts5              | 239 |
| Hpx                  | 239 |
| Casp11               | 239 |
| LOC305633            | 239 |
| Pgf                  | 238 |
| Mapkapk2             | 236 |
| Ampd3                | 236 |
| LOC312688            | 236 |
| Gpam                 | 235 |
| St6gal1              | 234 |
| Adcy2                | 234 |
| Nfkbib               | 233 |
| Nppc                 | 233 |
| LOC297481            | 233 |
| RGD1565371_predicted | 233 |
| Stat1                | 232 |
| Cd14                 | 232 |
| Tnnt2                | 232 |
| Ikbke_predicted      | 231 |
| Saa4                 | 230 |
| Ms4a11_predicted     | 230 |
| Lin7a                | 230 |
| LOC497816            | 230 |
| Nov                  | 229 |
| Mafb                 | 229 |
| Coro1a               | 229 |
| RGD1309576_predicted | 229 |
| Tnfrsf11b            | 229 |
| Akr1b8               | 227 |
| Btg2                 | 227 |
| Anpep                | 227 |
| Glrx1                | 227 |
| Igtp                 | 226 |
| RGD1565715_predicted | 226 |
| Es1                  | 225 |
| Csf1 (M-CSF)         | 225 |
| Cbx7                 | 224 |
| LOC499365            | 224 |
| Zfp36l1              | 224 |
| Abca2                | 223 |
| RT1-N3               | 223 |

|                      |     |
|----------------------|-----|
| Guca2b               | 206 |
| LOC500590            | 206 |
| RGD1559885_predicted | 205 |
| Il33                 | 204 |
| Bdkrb1               | 203 |
| Sema4a               | 203 |
| Pvalb                | 203 |
| Bst1                 | 203 |
| LOC363181            | 202 |
| Scly                 | 202 |
| RGD1563599_predicted | 202 |
| Pcsk2                | 201 |
| Rnd1                 | 201 |
| Baiap2               | 201 |
| Zbp1                 | 201 |
| Snf1lk               | 201 |
| Casp7                | 200 |
| Ugdh                 | 200 |
| Cesl1                | 200 |
| Mgst1                | 200 |
| Gsdmdc1_predicted    | 200 |
|                      |     |
| Mcam                 | 50  |
| Cspg2                | 50  |
| Tm4sf2_mapped        | 50  |
| Gem_predicted        | 50  |
| Phldb1               | 50  |
| Igsf4c_predicted     | 50  |
| Tmepai_predicted     | 50  |
| Aox1                 | 50  |
| Cpxm2_predicted      | 50  |
| RGD1311080_predicted | 50  |
| Oplah                | 50  |
| LOC500297            | 50  |
| RGD1310827           | 50  |
| Sfxn5                | 50  |
| Gfra1                | 50  |
| RGD1564040_predicted | 50  |
| Iqsec3               | 49  |
| Map2                 | 49  |
| RGD1565999_predicted | 49  |
| Akt1                 | 49  |
| Epb4.1l3             | 49  |
| Naprt1               | 49  |
| Ctsc                 | 49  |
| RGD1561795_predicted | 49  |
| LOC499741            | 49  |
| Nuak2                | 49  |
| Cav3                 | 49  |
| Pck2_predicted       | 49  |
| Slc38a1              | 49  |
| Ube2t_predicted      | 49  |
| RGD1307524_predicted | 49  |
| RGD1563615_predicted | 48  |
| Zic2_predicted       | 48  |
| LOC500506            | 48  |

|                      |     |
|----------------------|-----|
| Il1rl1               | 223 |
| Il18bp               | 223 |
| LOC363267            | 222 |
| Ugdh                 | 222 |
| Adamts1              | 222 |
| C4-2                 | 220 |
| Tcp11                | 220 |
| RGD1560819_predicted | 219 |
| Cd44                 | 218 |
| Ptpn1                | 218 |
| Fmod                 | 218 |
| Tyrobp               | 218 |
| Msc_predicted        | 217 |
| Sema4a               | 217 |
| Ctsb                 | 217 |
| Hhex                 | 217 |
| RGD1563354_predicted | 216 |
| Nmi                  | 216 |
| H2-M3                | 216 |
| Fcgr3a               | 215 |
| Socs3                | 214 |
| Plxnb2               | 214 |
| Ahr                  | 214 |
| Siglec10_predicted   | 214 |
| LOC499196            | 214 |
| Plxnd1_predicted     | 213 |
| Rela                 | 213 |
| RGD1560496_predicted | 213 |
| C1qa                 | 212 |
| Ece1                 | 211 |
| Herc1_predicted      | 211 |
| RT1-T24-1            | 211 |
| Ppap2a               | 211 |
| LOC500959            | 211 |
| LOC501211            | 210 |
| Sirpa                | 210 |
| Esm1                 | 210 |
| Bcl6_predicted       | 209 |
| Nos2 (iNOS)          | 209 |
| LOC307731            | 209 |
| Lama1_predicted      | 207 |
| Trim34_predicted     | 207 |
| Tmem123              | 207 |
| Atp11a_predicted     | 207 |
| Rbp2                 | 207 |
| Plac8_predicted      | 206 |
| Rdh10                | 206 |
| Rac2                 | 206 |
| Laptm5               | 206 |
| P4ha2_predicted      | 206 |
| Lrig1_predicted      | 206 |
| Ptafr                | 206 |
| Ogfrl1               | 206 |
| Hif1a                | 205 |
| RGD1306494_predicted | 205 |
| RGD1559845_predicted | 205 |

|                      |    |
|----------------------|----|
| F2r                  | 48 |
| LOC361480            | 48 |
| MGC72614             | 48 |
| Clstn1               | 48 |
| Cthrc1               | 48 |
| Mfap4                | 48 |
| Fgfr3                | 48 |
| LOC302405            | 48 |
| Trib3                | 48 |
| Ddx21a_predicted     | 48 |
| Actn4                | 48 |
| Pcdh8                | 48 |
| Uts2r                | 48 |
| Lrp4                 | 48 |
| RGD1559565_predicted | 48 |
| Gpcr12               | 48 |
| LOC497708            | 48 |
| LOC497673            | 48 |
| Hspb6                | 48 |
| Pcp4                 | 47 |
| RGD1565099_predicted | 47 |
| Rhob                 | 47 |
| LOC497892            | 47 |
| Mamdc2               | 47 |
| Epha5                | 47 |
| Abcb9                | 47 |
| Pcdh17_predicted     | 47 |
| Psph                 | 47 |
| Sparcl1              | 47 |
| LOC498795            | 47 |
| RGD1305844           | 47 |
| Npy                  | 46 |
| RGD1311530_predicted | 46 |
| Ednrb                | 46 |
| Cd59                 | 46 |
| Lrrc48               | 46 |
| Cubn                 | 46 |
| Pdgfc                | 46 |
| LOC361143            | 46 |
| Ccdc37_predicted     | 46 |
| Tnr                  | 46 |
| Boll_predicted       | 46 |
| Pea15a               | 46 |
| Emp1                 | 46 |
| LOC497844            | 46 |
| LOC361841            | 46 |
| PRKCQ                | 45 |
| Col8a2_predicted     | 45 |
| Ntrk3                | 45 |
| Tc2n                 | 45 |
| Cyp4b1               | 45 |
| Paqr4                | 45 |
| Mdga2                | 45 |
| LOC501633            | 45 |
| Ankh                 | 45 |
| Tle3                 | 45 |

|                      |     |
|----------------------|-----|
| Apol3_predicted      | 204 |
| Duox1                | 204 |
| RGD1561940_predicted | 204 |
| Ppif                 | 203 |
| Klf4                 | 202 |
| Ston2_predicted      | 201 |
| Ikbkb                | 201 |
| Centg2_predicted     | 201 |
| P2rx5                | 200 |
| Ifi204               | 200 |
|                      |     |
| Schip1               | 50  |
| Cars_predicted       | 50  |
| Cldn19               | 50  |
| Odc1                 | 50  |
| Arhgap21_predicted   | 50  |
| Prkag2               | 50  |
| Rapgef4              | 50  |
| Hsd17b7              | 50  |
| Bambi                | 50  |
| Cldn9                | 50  |
| Abhd1                | 50  |
| Gucy1b3              | 50  |
| LOC361480            | 50  |
| Hs3st1               | 50  |
| Sc5dl                | 50  |
| Plcl1                | 49  |
| Abcb9                | 49  |
| Ankh                 | 49  |
| Fat3                 | 49  |
| RGD1309107           | 49  |
| Gpc4                 | 49  |
| Klhl13               | 49  |
| Slc7a1               | 49  |
| RGD1562701_predicted | 49  |
| Cpa2_predicted       | 48  |
| Arvcf_predicted      | 48  |
| RGD1562618_predicted | 48  |
| Rarres1              | 48  |
| Cspg4                | 48  |
| RGD1564335_predicted | 48  |
| Kcnd3                | 48  |
| Bhlhb3               | 48  |
| Olig1                | 48  |
| LOC497806            | 48  |
| Trim9                | 48  |
| Hspb6                | 48  |
| Tm4sf1_predicted     | 48  |
| Cltb                 | 47  |
| Apeg3                | 47  |
| Uts2r                | 47  |
| LOC497892            | 47  |
| Myl9_predicted       | 47  |
| LOC501268            | 47  |
| Fstl5_predicted      | 47  |
| RGD1561795_predicted | 47  |



|                      |    |
|----------------------|----|
| Nefl                 | 45 |
| Ahrr                 | 45 |
| Chdh                 | 45 |
| Ezr                  | 45 |
| Zfp312_predicted     | 45 |
| Crhbp                | 44 |
| Plec1                | 44 |
| Eln                  | 44 |
| Plcl1                | 44 |
| Myl9_predicted       | 44 |
| C1ql1_predicted      | 44 |
| LOC499856            | 44 |
| Htra3_predicted      | 44 |
| Plxdc2_predicted     | 44 |
| RGD1561090_predicted | 44 |
| Metrn                | 44 |
| Prom1                | 44 |
| Slc5a3               | 44 |
| Wfdc1                | 44 |
| Ascl1                | 43 |
| Snurf                | 43 |
| RGD1311307           | 43 |
| Ngef_predicted       | 43 |
| Acot1                | 43 |
| Ptms                 | 43 |
| Timp2                | 43 |
| Msn                  | 43 |
| Gpc4                 | 43 |
| RGD1308329_predicted | 43 |
| RGD1561817_predicted | 43 |
| Ephb1                | 43 |
| Angptl2              | 42 |
| Thrsp                | 42 |
| Chac1_predicted      | 42 |
| Vldlr                | 42 |
| Sema7a_predicted     | 42 |
| Tm4sf1_predicted     | 42 |
| Asphd2               | 42 |
| S100b                | 42 |
| Stmn2                | 42 |
| Gamt                 | 42 |
| Chst1                | 42 |
| Asns                 | 41 |
| Olfm1                | 41 |
| Aldoc                | 41 |
| Pthr1                | 41 |
| Ppp1r1b              | 41 |
| Fos                  | 41 |
| Cltb                 | 41 |
| Phgdh                | 41 |
| Gabrb1               | 40 |
| Slco1c1              | 40 |
| Dmd                  | 40 |
| RGD1563465_predicted | 40 |
| Atf5                 | 40 |
| Kcnd3                | 40 |

|                      |    |
|----------------------|----|
| RGD1309930           | 46 |
| Fbn2                 | 46 |
| Cacng4               | 46 |
| Cd24                 | 46 |
| Iqsec3               | 46 |
| Mfap4                | 46 |
| MGC112883            | 46 |
| Ocln                 | 46 |
| Eln                  | 46 |
| Myh11                | 46 |
| Id2                  | 46 |
| Sdc2                 | 46 |
| Dhcr7                | 46 |
| Folh1                | 46 |
| Epb4.1l3             | 46 |
| Mybl1_predicted      | 46 |
| Sc4mol               | 45 |
| LOC501633            | 45 |
| Cubn                 | 45 |
| LOC498795            | 45 |
| Tsc22d3              | 45 |
| Zfp312_predicted     | 45 |
| Ppp1r1b              | 45 |
| Eno3                 | 45 |
| Cxxc5                | 45 |
| Loxl2_predicted      | 45 |
| Trib3                | 45 |
| Scd1                 | 44 |
| Prkcb1 (PKCbeta)     | 44 |
| Slco1c1              | 44 |
| LOC362870            | 44 |
| Tnr                  | 44 |
| RGD1308967_predicted | 44 |
| RGD1564008_predicted | 44 |
| Sox6_predicted       | 44 |
| RGD1561090_predicted | 44 |
| Mgll                 | 44 |
| LOC499741            | 44 |
| Ccdc37_predicted     | 44 |
| Nefl                 | 44 |
| Nes                  | 43 |
| Ucp2                 | 43 |
| Ntrk3                | 43 |
| Cd59                 | 43 |
| Ppp2r2b              | 43 |
| Chac1_predicted      | 43 |
| LOC290704            | 43 |
| Gabrb1               | 43 |
| Pcdh17_predicted     | 43 |
| Prom1                | 42 |
| Scrg1                | 42 |
| Npvf                 | 42 |
| LOC363498            | 42 |
| Scrn1                | 42 |
| Map1b                | 42 |
| Slc15a2              | 42 |

|                      |    |
|----------------------|----|
| Myh11                | 40 |
| Mlc1_predicted       | 40 |
| Kcnk3                | 40 |
| Slc7a3               | 40 |
| LOC684490            | 40 |
| Sult1a1              | 39 |
| RGD1564335_predicted | 39 |
| Hspa2                | 39 |
| Fstl3                | 39 |
| Ckb                  | 39 |
| Klhdc8b              | 39 |
| Atp1b1               | 39 |
| Jun                  | 39 |
| Hspb1                | 38 |
| RGD1311049_predicted | 38 |
| Tmbim1               | 38 |
| Gdpd2_predicted      | 38 |
| Ssg1                 | 38 |
| Sidt2_predicted      | 38 |
| Gnao1                | 37 |
| Errfi1               | 37 |
| Igfbp3               | 37 |
| Crip2                | 37 |
| Cldn19               | 37 |
| Fbln2                | 37 |
| LOC316573            | 37 |
| RGD1308967_predicted | 36 |
| Ddr1                 | 36 |
| RGD1560177_predicted | 36 |
| Boc_predicted        | 36 |
| Myo16                | 36 |
| MGC112790            | 36 |
| Myh10                | 36 |
| Akap12               | 36 |
| Gpr56                | 36 |
| Fbxo2                | 36 |
| Ca3                  | 36 |
| Scn7a                | 36 |
| Leprel1              | 35 |
| Actg2                | 35 |
| Gfap                 | 35 |
| Tinagl1              | 35 |
| Cacng4               | 35 |
| Pcbp3_predicted      | 35 |
| Pmp22                | 34 |
| Rgs2                 | 34 |
| Cttna1_predicted     | 34 |
| Car9_predicted       | 34 |
| Slc15a2              | 34 |
| Map1b                | 33 |
| Igsf11               | 33 |
| LOC362870            | 33 |
| Col11a1              | 33 |
| Mgll                 | 33 |
| Mt3                  | 33 |
| Lpl                  | 33 |

|                      |    |
|----------------------|----|
| LOC302022            | 42 |
| Gclc                 | 42 |
| Ptpro                | 42 |
| Foxd4                | 42 |
| Cpxm2_predicted      | 42 |
| RGD1307150_predicted | 41 |
| RGD1564040_predicted | 41 |
| S100b                | 41 |
| PRKCQ                | 41 |
| Gpm6a                | 41 |
| RGD1308329_predicted | 41 |
| Fbxo2                | 41 |
| Aox1                 | 41 |
| Adamts9_predicted    | 40 |
| Emp1                 | 40 |
| Tc2n                 | 40 |
| Tle3                 | 40 |
| Ap1s2_predicted      | 40 |
| Wfdc1                | 40 |
| Rpe65                | 40 |
| Prkcdbp              | 40 |
| Tmbim1               | 39 |
| Scn3b                | 39 |
| Trpm6_predicted      | 39 |
| Cyp51                | 39 |
| Idi1                 | 39 |
| Fdps                 | 39 |
| Hopx                 | 39 |
| Nrg1                 | 39 |
| Gulp1                | 39 |
| LOC497703            | 39 |
| Gnao1                | 39 |
| LOC497814            | 39 |
| Adra1b               | 39 |
| Ncam1                | 39 |
| RGD1563615_predicted | 39 |
| Gpr56                | 39 |
| Slc27a3_predicted    | 38 |
| Lrrc48               | 38 |
| Ttyh1_predicted      | 38 |
| Itga11_predicted     | 38 |
| Kcnk3                | 38 |
| Atp1b1               | 38 |
| Ascl1                | 38 |
| Crhbp                | 37 |
| Lxn                  | 37 |
| Fbln5                | 37 |
| Tpm1                 | 36 |
| Phgdh                | 36 |
| Sult1a1              | 36 |
| Ephb1                | 36 |
| Myo16                | 35 |
| Tinagl1              | 35 |
| Hmgcs1               | 35 |
| Galnt1               | 35 |
| Slc38a1              | 34 |

|                      |    |
|----------------------|----|
| Sez6                 | 33 |
| Nes                  | 32 |
| Chst2_predicted      | 32 |
| Timp3                | 32 |
| Dmn                  | 32 |
| Cxcr4                | 31 |
| Slc39a12_predicted   | 31 |
| Scrg1                | 31 |
| Tpm1                 | 31 |
| Col12a1              | 31 |
| Adamts9_predicted    | 30 |
| RGD1305809_predicted | 30 |
| RGD1310174_predicted | 30 |
| Slc7a5               | 30 |
| Sorl1_predicted      | 30 |
| Tagln3               | 29 |
| Cyp1a1               | 29 |
| Cryab                | 29 |
| Maob                 | 28 |
| Fbln5                | 28 |
| Cnn1                 | 28 |
| Cldn9                | 27 |
| Lsamp                | 27 |
| LOC311772            | 26 |
| Sostdc1              | 25 |
| Slc6a15              | 25 |
| Flnc_predicted       | 25 |
| Aldh1a1              | 25 |
| Fhl1                 | 25 |
| Tmeff2_predicted     | 24 |
| Cd24                 | 24 |
| Tgfb3                | 24 |
| Klhdc8a              | 24 |
| Fgfbp1               | 24 |
| Omd                  | 24 |
| Col6a3_predicted     | 24 |
| Rpe65                | 24 |
| RGD1310242           | 23 |
| Gldn                 | 23 |
| Fez1                 | 22 |
| Atp1a2               | 21 |
| RGD1564664_predicted | 20 |
| Gpr3711              | 20 |
| Galnt1               | 20 |
| Ogn_predicted        | 19 |
| Gria2 (AMPA-R)       | 19 |
| Ttyh1_predicted      | 19 |
| Atp1b2               | 19 |
| RGD1560183_predicted | 18 |
| LOC499513            | 15 |
| Calb1                | 12 |
| LOC363443            | 11 |
| Acta1                | 10 |
|                      |    |
|                      |    |
|                      |    |

|                      |    |
|----------------------|----|
| Neto2_predicted      | 34 |
| LOC498228            | 34 |
| Sostdc1              | 34 |
| Tm7sf2               | 34 |
| Igsf11               | 34 |
| RGD1563465_predicted | 33 |
| Chst2_predicted      | 33 |
| Timp3                | 33 |
| Cyp1a1               | 33 |
| RGD1311307           | 33 |
| Sorl1_predicted      | 33 |
| Lsamp                | 33 |
| MGC112790            | 33 |
| Tmepai_predicted     | 32 |
| Lpl                  | 32 |
| Cxcr4                | 32 |
| Psph                 | 32 |
| RGD1310242           | 32 |
| Leprel1              | 32 |
| Ctnnal1_predicted    | 31 |
| Dmd                  | 31 |
| Fhl1                 | 31 |
| Aldh1a1              | 31 |
| Asns                 | 31 |
| Tgfb3                | 31 |
| Tagln3               | 30 |
| Lcat                 | 30 |
| RGD1305809_predicted | 29 |
| LOC684490            | 29 |
| LOC316573            | 29 |
| Dmn                  | 29 |
| Sidt2_predicted      | 29 |
| Fez1                 | 28 |
| LOC499856            | 28 |
| Actg2                | 28 |
| LOC500297            | 28 |
| MGC72614             | 27 |
| Atf5                 | 27 |
| Slc6a15              | 27 |
| Col11a1              | 27 |
| Klhdc8a              | 26 |
| Mal                  | 25 |
| Fgfbp1               | 24 |
| RGD1310174_predicted | 24 |
| Slc39a12_predicted   | 24 |
| Igfbp3               | 24 |
| LOC311772            | 23 |
| Acot1                | 23 |
| Cryab                | 22 |
| Pcp4                 | 22 |
| RGD1560183_predicted | 21 |
| Gldn                 | 20 |
| Hmgcs2               | 19 |
| Gria2 (AMPA-R)       | 19 |
| Slc7a3               | 19 |
| Slc7a5               | 18 |

|  |  |
|--|--|
|  |  |
|  |  |
|  |  |
|  |  |
|  |  |
|  |  |
|  |  |
|  |  |

|               |    |
|---------------|----|
| Ca3           | 18 |
| LOC499513     | 15 |
| Omd           | 14 |
| Ogn_predicted | 13 |
| LOC363443     | 11 |
| Calb1         | 9  |
| Acta1         | 6  |
